## 58 Introduction

59 The Candidate Phyla Radiation (CPR) comprises a huge fraction of Domain Bacteria. The scale of the radiation  
60 remains unclear, but it may include as much as 26-50% of all bacterial diversity (Hug et al. 2016; Parks et al.  
61 2017; Schulz et al. 2017). The CPR bacteria uniformly have small genomes (often ~1 Mbp) and limited  
62 biosynthetic capacity (Brown et al. 2015; Anantharaman et al. 2016; Hug et al. 2016; Castelle and Banfield  
63 2018). Most are thought to be symbionts, in some cases cell surface attached (episymbionts), that depend on  
64 other bacteria for basic cellular building blocks (for review, see (Castelle and Banfield 2018)).

65 A previous meta-analysis found that only 2.4% of organisms from the Parcubacteria (OD1) and  
66 Microgenomates (OP11) superphyla encode CRISPR-Cas systems in their genomes, as compared to 47.4% in  
67 archaea and 24.4% in non-CPR bacteria (Burstein et al. 2016). The authors noted that when CRISPR-Cas systems  
68 occur in CPR bacteria they tend to be different from those found in other bacteria. Four genomes from  
69 Dojkabacteria (WS6), Parcubacteria (OD1) and Roizmanbacteria were previously recognized to encode CRISPR-  
70 Cas12a (Cpf1) systems (Zetsche et al. 2015), and more recently, six genomes were reported encoding a newly  
71 recognized compact CasY effector enzyme that has genome editing potential (Burstein et al. 2017).

72 Several potential explanations for the low frequency of CRISPR-Cas systems in CPR bacteria have  
73 been suggested (Burstein et al. 2016). Small genome size may favor use of more compact restriction-  
74 modification systems for phage defense and low ribosome content may preclude sufficiently fast-acting  
75 CRISPR-Cas systems required for effective interference (Burstein et al. 2016). Symbiotic lifestyles, characterized  
76 by close association between multiple cells and a host cell, could lead to higher phage densities, which may  
77 cause selection of defense systems other than CRISPR-Cas (Westra et al. 2015). It has also been suggested that  
78 CPR bacteria may not have the RecBCD mechanism identified in non-CPR Bacteria to curtail self-targeting  
79 spacer acquisition (Levy et al. 2015; Castelle et al. 2018).

80 As few phage that infect CPR bacteria have been reported (Paez-Espino et al. 2016; Dudek et al.  
81 2017), it is difficult to know how common phage that infect these bacteria might be. Phage particles in the  
82 process of infecting CPR bacterial cells have been observed via cryogenic electron microscopy (Luef et al. 2015).  
83 However, the sequences of phage associated with CPR bacteria are unusually difficult to identify in  
84 metagenomic datasets, in part due to the lack of CRISPR spacers that could be used to link them to host cells  
85 via CRISPR targeting (Andersson and Banfield 2008). Further, like phage, CPR genomes encode a very high  
86 proportion of novel proteins (Castelle and Banfield 2018), which obscures identification of potential prophage  
87 regions. Finally, phage structural proteins may be too divergent from those of well-studied phage to be  
88 identified. To date, phage have only been reported for bacteria from two CPR phyla,  
89 Absconditabacteria (previously SR1) and Saccharibacteria (previously TM7) (Paez-Espino et al. 2016; Dudek et  
90 al. 2017). Thus, there is a potentially huge knowledge gap related to the existence and diversity of CPR phage.  
91 This motivates the search for new CPR genomes with CRISPR-Cas systems that could potentially provide links to  
92 additional examples of phage that replicate in these bacteria.

93 In the current study, we investigated the microbiomes of a series of hot springs in Tibet. CPR bacteria  
94 are relatively abundant in these thermal environments, and some of their genomes encode interesting and  
95 unusual CRISPR-Cas systems. Although uncommon overall, CRISPR-Cas systems are surprisingly frequently  
96 encoded in the genomes of members of the Roizmanbacteria, and multiple different systems coexist in some  
97 genomes. We identified many new examples of systems based on CasY and uncovered an intriguing example of  
98 a locus with self-targeting spacers and a fragmented CasY gene. We identified CPR phage for which complete,  
99 curated genomes were reconstructed, as well as prophage in other genomes. Thus, our analyses provide new  
100 insights into CPR biology, their phage and the diversity of the relatively unstudied CRISPR-CasY system.

## 101 Materials and methods

### 102 *Study site, sampling and physicochemical determination*

103 Hot spring (40.8 - 84.9 °C) sediment samples were collected from Tibet Plateau (China) in August 2016  
104 [Supplementary Table 1](#)). As described previously (Song et al. 2012), sediment samples were collected from the  
105 hot spring pools using a sterile iron spoon into 50 ml sterile tubes, transported to the lab on dry ice, and stored  
106 at -80 °C for DNA extraction. Temperature, dissolved oxygen (DO) and pH were determined *in situ* and the  
107 other physicochemical parameters were analyzed in the laboratory ([Supplementary Table 1](#)).

### 108 *DNA extraction, sequencing, quality control and metagenomic assembly*

109 Genomic DNA was extracted from sediment samples using the FastDNA SPIN kit (MP Biomedicals, Irvine, CA)  
110 according to the manufacturer's instructions. The DNA samples were purified for library construction, and  
111 sequenced on an Illumina HiSeq2500 platform with PE (paired-end) 150 bp kits. The raw data of each  
112 metagenomic dataset were filtered to remove Illumina adapters, PhiX and other Illumina trace contaminants  
113

115 with BBTools, and low quality bases and reads using Sickle (version 1.33; <https://github.com/najoshi/sickle>). The  
116 high-quality reads of each sample were assembled using metaSPADES (version 3.10.1) (Bankevich et al. 2012)  
117 with a kmer set of 21, 33, 55, 77, 99, 127.

118

#### 119 *HMM-based search of CasY proteins and confirmation of CRISPR-CasY system*

120 The six CasY proteins reported previously (Burstein et al. 2017) were aligned using Muscle (Edgar 2004), and  
121 filtered to remove those columns comprising 95% or more gaps with TrimAL (Capella-Gutiérrez, Silla-Martínez,  
122 and Gabaldón 2009). A HMM model was built based on the filtered alignment using hmmbuild 2 (Eddy 1998)  
123 with default parameters, hmmsearch was used to search all the proteins predicted by Prodigal from scaffolds.  
124 Those hits with an e-value < 10<sup>-5</sup> were manually checked, and the online tool CRISPRs finder (Grissa et al. 2008)  
125 was used to identify the Cas1 protein and CRISPR loci. Only those scaffolds detected with CasY, Cas1 and  
126 CRISPR array were retained for further analyses. Other CRISPR-Cas systems identified in these genomes based  
127 on the presence of Cas proteins and CRISPR arrays were also analyzed in this study.

128

#### 129 *Extension and manual curation of CasY scaffolds*

130 Those scaffolds with partial CasY representatives were manually extended as follows: (1) mapping the high  
131 quality reads to the corresponding scaffolds using bowtie2 with default parameters; (2) filtering the mapping  
132 files using mapped.py (part of the ra2 suite) to remove those PE reads with two or more mismatches to the  
133 assembled scaffold across both reads combined; (3) importing the filtered mapping files into Geneious and  
134 mapping using the "Map to Reference" function; (4) extending the scaffolds at the partial CasY protein ends; (5)  
135 performing the first 4 steps again (multiple times if necessary) until full length CasY proteins were obtained.

136 The extended scaffolds and other full-length CasY scaffolds were checked for any potential assembly  
137 errors using ra2.py ([https://github.com/christophertbrown/fix\\_assembly\\_errors/releases/tag/2.00](https://github.com/christophertbrown/fix_assembly_errors/releases/tag/2.00)), the  
138 general strategy was described previously (Brown et al. 2015). Errors reported as unresolved by ra2.py were  
139 fixed manually in Geneious using unplaced paired reads that were mapped to the scaffolding gaps.

140

#### 141 *Coverage calculation, genome binning, genome curation and completeness assessment*

142 The high quality reads were mapped to the corresponding assembled scaffolds using bowtie2 with default  
143 parameters and the coverage of each scaffold calculated as the total number of bases mapped to it divided by  
144 its length. For each sample, scaffolds over 2500 bp were assigned to preliminary draft genome bins using  
145 MetaBAT with default parameters, considering both tetranucleotide frequencies (TNF) and scaffold coverage  
146 information. The clustering of scaffolds from the bins and the unbinned scaffolds was visualized using ESOM  
147 with a min length of 2500 bp and max length of 5000 bp as previously described (Dick et al. 2009). Misplaced  
148 scaffolds were removed from bins and unbinned scaffolds whose segments were placed within the bin areas of  
149 ESOMs were added to the bins. Scaffolds ≥ 1000 bp from each sample were uploaded to ggkbase  
150 (<http://ggkbase.berkeley.edu/>). The ESOM-curated bins with interesting CasY-bearing scaffolds were further  
151 evaluated based on consistency of GC content, coverage and taxonomic information, and scaffolds identified as  
152 contaminants were removed. The genome bins with CRISPR-CasY systems were curated individually to fix local  
153 assembly errors using ra2.py, as described above. A total of 50 single copy genes (SCGs) that are commonly  
154 detected in CPR bacteria ([Supplementary Table 2](#)) were used to evaluate genome completeness.

155

#### 156 *Gene prediction and metabolic prediction*

157 The protein-coding genes of the curated genomes (see above) were predicted using Prodigal (-m single)(Hyatt  
158 et al. 2010), and searched against KEGG, UniRef100 and UniProt for annotation, and metabolic pathways were  
159 reconstructed. The 16S rRNA genes were predicted based on HMM models, as previously described (Brown et  
160 al. 2015). The ribosome binding site sequence was obtained via the Prodigal gene prediction results.

161

#### 162 *CRISPR loci reconstruction and spacer identification*

163 For all the confirmed CRISPR-CasY and other CRISPR-Cas systems, the quality reads were aligned to the  
164 scaffolds from the corresponding sample using bowtie2 with default parameters (Brown et al. 2015; Langmead  
165 and Salzberg 2012). Any unmapped reads of read pairs were mapped to the scaffolds in Geneious using the  
166 function of "Map to Reference", then the CRISPR loci were manually reconstructed, allowing for spacer set  
167 diversification and loss of spacer-repeat units in some cells. Thus, it was possible to place most reads in an  
168 order that reflects the locus evolutionary history. For each CRISPR locus, all the reads that mapped were  
169 extracted, and spacers between two direct repeats were used for target searches (see below).

170

#### 171 *Spacers target search and identification of (pro)phage scaffolds*

172 All the spacer sequences from each CRISPR locus were dereplicated, then the sequences were searched against  
173 scaffolds from related samples using BLASTn with the following parameters: -task blastn-short, -dust no, -  
174 word\_size 8. Those scaffolds with 0 mismatch and 100% alignment coverage to one or more spacers were  
175 manually checked for phage-specific proteins, including capsid, phage, virus, prophage, terminase, prohead,  
176 tape measure, tail, head, portal, DNA packaging, as described previously (Dudek et al. 2017).

177

178 *In silico determination of protospacer adjacent motif (PAM)*

179 To determine the PAM of the CRISPR-CasY systems in Roizmanbacteria genomes, for each CRISPR spacer with a  
180 target in two complete phage genomes from QZM (see results), the upstream 5 bp and downstream 5 bp of the  
181 targeted DNA strand were searched manually and the PAM was determined and visualized using Weblogo  
182 (Crooks et al. 2004). The PAM analyses for other CRISPR-Cas systems analyzed in this study were performed in  
183 the same way.

184

185 *Phylogenetic analyses*

186 Phylogenetic analyses were performed using (1) 16 ribosomal proteins (16 RPs) and (2) 16S rRNA genes of  
187 genomes of interest with CRISPR-CasY and/or other CRISPR systems (Table 1), (3) CasY proteins, (4) Cpf1  
188 proteins, and (5) capsid proteins of CPR (pro)phage:

189 (1) 16 RPs analyses: After preliminary classification based on the ribosomal protein S3 (rpS3)  
190 taxonomy, reference genomes were downloaded from NCBI (131 in total) and dereplicated using dRep (“-sa  
191 0.95 -nc 0.5”) (Olm et al. 2017). A higher similarity threshold was used to perform dereplication of newly  
192 reconstructed genomes from hot spring sediment samples (“-sa 0.99 -nc 0.5”), to clarify the overall diversity.  
193 The 16 RPs (i.e., L2, L3, L4, L5, L6, L14, L15, L16, L18, L22, L24, S3, S8, S10, S17 and S19) were predicted from all  
194 the dereplicated genomes.

195 (2) 16S rRNA genes sequences: The 16S rRNA genes were predicted from all the dereplicated  
196 genomes (see above) using HMM-based searches (Brown et al. 2015). All the insertion sequences with lengths >  
197 10 bp were removed.

198 (3) CasY proteins: all partial and full length CasY proteins from confirmed CRISPR-CasY systems in this  
199 study and the previously reported CasY proteins were included in a phylogenetic tree, with c2c3 proteins as the  
200 outgroup.

201 (4) Cas12a (Cpf1) proteins: the Cas12a proteins in NCBI and our dataset were identified and used to  
202 construct a tree with Cas12c (C2c3) proteins as the outgroup.

203 (5) CPR (pro)phages: the capsid protein was used as a marker to build phylogenetic trees for CPR  
204 (pro)phage. The capsid proteins identified in this study were searched against the NCBI RefSeq Phage Capsid  
205 proteins, the first 5 blast hits were used as reference proteins, along with those in previously reported in CPR  
206 phage genomes (Paez-Espino et al. 2016; Dudek et al. 2017).

207 For tree construction, protein sequences datasets were aligned using Muscle (Edgar 2004). The 16S  
208 rRNA gene sequences were aligned using the SINA alignment algorithm (Edgar 2004; Pruesse, Peplies, and  
209 Glöckner 2012) through the SILVA web interface (Pruesse et al. 2007). All the alignments were filtered using  
210 TrimAL (Capella-Gutiérrez, Silla-Martínez, and Gabaldón 2009) to remove those columns comprising more than  
211 95% gaps. For the 16 RP, ambiguously aligned C and N termini were removed and the amino acid sequences,  
212 which were concatenated in the order as stated above (alignment length, 2654 aa). The phylogenetic trees  
213 were reconstructed using RAxML version 8.0.26 with the following options: -m PROTGAMMALG (GTRGAMMAL  
214 for 16S rRNA phylogeny) -c 4 -e 0.001 -# 100 -f a (Capella-Gutiérrez, Silla-Martínez, and Gabaldón 2009;  
215 Stamatakis 2014). All the trees were uploaded to iTOL v3 for visualization and formatting (Letunic and Bork  
216 2006).

217

218 *Data availability*

219 The reconstructed CPR and their infecting phage genomes reported in the current study were deposited at  
220 NCBI within BioProject PRJNA493250 (BioSample SUB4567433), under the accession numbers of xxx-xxx. The  
221 unbinned scaffolds with CRISPR-CasY system were deposited under the NCBI accession numbers of xxx-xxx. All  
222 genomic data can be explored and downloaded from ggKbase  
223 ([https://ggkbase.berkeley.edu/Tibet\\_CRISPR\\_CasY/organisms](https://ggkbase.berkeley.edu/Tibet_CRISPR_CasY/organisms)) following publication of this manuscript. Note  
224 that registration by provision of an email address is required prior to data download.

225

226 **Results**

227 ***Newly reconstructed Roizmanbacteria and Woesebacteria genomes with CRISPR-Cas systems***

228 CPR bacteria collectively accounted for up to 43.1% of the analyzed hot spring communities (Supplementary



229 **Figure 1.** We selected 17 genomes that encode CRISPR-Cas systems for curation (**Figure 1a, Table 1**). Based on  
230 rpS3 protein taxonomic analysis, one *Woesebacteria* genome and 12 *Roizmanbacteria* genomes encode  
231 CRISPR-CasY systems, and four other *Roizmanbacteria* genomes encode only type III-A CRISPR-Cas systems.  
232 Both of these phylum-level groups place within the Microgenomates (OP11) (Hug et al. 2016; Brown et al.  
233 2015). Phylogenetic analyses based on 16 RPs with published *Roizmanbacteria* genomes (43 dereplicated in  
234 total) indicated the divergence of the newly reconstructed *Roizmanbacteria* from previously published  
235 genomes (**Figure 1a**). The new *Roizmanbacteria* genomes were assigned to two distinct classes based on their  
236 16S rRNA gene sequences (Yarza et al. 2014) and/or average nucleotide identity (ANI) (**Figure 1a**,  
237 **Supplementary Figure 2**). Five of the genomes represent two different strains, with an ANI of 98.39% (clade 1;  
238 **Figure 1a**), and the other 11 genomes belong to the same family (clade 2; **Figure 1a**). Genomes in clade 1 and 2  
239 were assigned to groups (**Figure 1a, Table 1**).

240

#### 241 ***CRISPR-CasY detected in Roizmanbacteria and Woesebacteria genomes***

242 We identified 69 CasY candidates (see methods), 17 of which are on scaffolds with a Cas1 protein and CRISPR  
243 locus (**Supplementary Table 3**). Of these, 12 scaffolds could be assigned to *Roizmanbacteria* genomes and one  
244 to a *Woesebacteria* genome (**Table 1**). The other four scaffolds with CRISPR-CasY systems could not be binned,  
245 but were also included in our analyses (**Figure 1b**).

246 The CRISPR-CasY systems from *Roizmanbacteria* and *Woesebacteria* have a different architecture  
247 than those reported previously (Burstein et al., 2017), with CasY and Cas1 proteins on the same side of the  
248 CRISPR locus (**Figure 1a**). The *Roizmanbacteria* CasY proteins have similar lengths of 1252-1256 aa, whereas  
249 that found in the *Woesebacteria* is 1304 aa (**Supplementary Table 3**), comparable to lengths of previously  
250 reported CasY (1153-1287 aa; (Burstein et al. 2017)). Phylogenetic analyses of CasY proteins showed that the  
251 newly reported *Roizmanbacteria* and *Woesebacteria* sequences are most closely related to CasY.1 from  
252 *Candidatus Katanobacteria* (WWE3; (Burstein et al. 2017)) (**Figure 1b**).

253 CasY is an effector protein of Type V CRISPR-Cas systems. To date, all reported Type V CRISPR-Cas  
254 systems have RuvC-like nuclease domains (Burstein et al. 2017; Chen and Doudna 2017). Comparative analyses  
255 of all CasY proteins reported in this study and CasY.1 with Cpf1, C2c1 and C2c3 references (Shmakov et al.,  
256 2015), identified all the catalytic residues within the three conserved motifs of RuvC-I, RuvC-II and RuvC-III  
257 (**Figure 1b**), suggesting the RuvC domains in the new CasY proteins are active nucleases. On the other hand, we  
258 detected divergence in other regions of the CasY proteins from different sampling sites (**Figure 1b**).

259

#### 260 ***Other CRISPR-Cas systems identified in Roizmanbacteria genomes***

261 A Type III-A system was detected in all 11 clade 2 *Roizmanbacteria* genomes, seven of which encode more than  
262 one type of system (**Figure 1a, Supplementary Figure 2**). The genomes differ in terms of the presence or  
263 absence of Cas1 and Cas2 proteins (**Supplementary Table 3**), which are used for acquisition of new spacers  
264 (Shmakov et al. 2015; Hille et al. 2018; Nuñez et al. 2014). In detail, III-A systems in C2-Gp4 and C2-Gp5 have  
265 both Cas1 and Cas2. C2-Gp6 and C2-Gp7 possess Cas1 but not Cas2. Four genomes in C2-Gp3 lack both Cas1  
266 and Cas2 but have a Mor transcription activator family protein (**Figure 1a and Supplementary Table 3**).  
267 However, the CRISPR-Cas system in C2-Gp3 may be non-functional because the repeats are imperfect. A  
268 fragment of the C2-Gp3 genomes encodes the 16 ribosomal proteins used for phylogenetic analyses and a  
269 restriction-modification system that may instead be used for phage defense (**Figures 2a and b**).

270 A Type I-B system was identified in two *Roizmanbacteria* genomes belonging to the same genus (C2-  
271 Gp5 and C2-Gp7), but not in the C2-Gp6 genomes, despite the fact that C2-Gp5 and C2-Gp7 are very closely  
272 related to C2-Gp6 (ANI = 99% and 16S similarity = 98.9%). Comparative genomic analyses showed that the Type  
273 I-B system is located between genes encoding a secreted cysteine-rich protein and a lamin tail domain protein  
274 that are present in both genomes (**Supplementary Figure 3b**). Two very short hypothetical proteins were  
275 detected between the cysteine-rich and lamin tail domain proteins in the C2-Gp6 genomes (**Supplementary**  
276 **Figure 3b**). However, NCBI BLAST and HMM searches indicate no homology of the hypothetical proteins to any  
277 known proteins or functional domains, respectively, and no significant similarity to the Cas proteins of Type I-B  
278 systems in the C2-Gp5 and C2-Gp7 genomes.

279

#### 280 ***CRISPR-Cas12a systems in published Roizmanbacteria genomes***

281 We investigated 131 published *Roizmanbacteria* genomes available from NCBI to identify all CRISPR-Cas  
282 systems that occur in these bacteria (**Supplementary Table 4**). The CRISPR-Cas12a system (Cpf1), which was  
283 identified in one *Roizmanbacteria* genome (Zetsche et al. 2015), occurred in four *Roizmanbacteria* genomes  
284 from two classes (**Figure 1a, Supplementary Figures 2 and 4**), one of them in the class containing  
285 *Roizmanbacteria* clade II with type I-B and III-A systems (see above).

286 Interestingly, the CRISPR-Cas12a systems reported in (Zetsche et al. 2015) from Candidatus  
287 Roizmanbacteria bacterium CG\_4\_9\_14\_0\_2\_um\_filter\_39\_13 included two Cas12a proteins. We refer to the  
288 one near the CRISPR locus as Cas12a, and the other as Cas12a' (Figure 1a). Phylogenetic analyses of Cas12a and  
289 Cas12a' proteins (previously reported and identified in this study) indicated those in CPR genomes could be  
290 assigned into at least three groups (Supplementary Figure 4a). Group 1 includes the Cas12a proteins from the  
291 two genomes with both Cas12a and Cas12a', and is highly divergent from other Cas12a proteins. Group 2  
292 includes the Cas12a' of Candidatus Roizmanbacteria bacterium CG\_4\_9\_14\_0\_2\_um\_filter\_39\_13, along with  
293 the Cas12a proteins from another two genomes. Group 3 includes Cas12a' of Candidatus Roizmanbacteria  
294 bacterium GW2011\_GWA2\_37\_7 (Zetsche et al. 2015) and clusters together with Cas12a from non-CPR  
295 Bacteria and Archaea.

296 The RuvC domains (-I, -II, -III) of the CPR Cas12 and Cas12' group 2 and 3 proteins include all the  
297 conserved catalytic residues in (Supplementary Figure 4b). However, in group 1 proteins, the conserved RuvC-II  
298 glutamic acid catalytic residue "E" was substituted by asparagine "N", and in RuvC-III asparagine "N" was  
299 substituted to valine "V". These substitutions suggest that the Cas12a in the systems with both Cas12a and  
300 Cas12a' may not perform cleavage as documented previously (Zetsche et al. 2015).

301

### 302 **Roizmanbacteria-infecting phages from Podoviridae and Siphoviridae**

303 A total of 1118 spacers perfectly targeted (100% match and 100% alignment coverage; see methods) 565  
304 unique scaffolds. Of these, 156 of them were targeted by two or more spacers (153 from the QZM samples of  
305 the current study) (Supplementary Table 5). Eleven of the CRISPR spacer-targeted scaffolds encode a phage  
306 capsid protein, which was used as a marker for phylogenetic analyses (Figure 3). Five additional scaffolds  
307 encoding a similar capsid protein were identified by a BLAST search. Capsid proteins were also predicted from  
308 the Absconditabacteria (SR1) phage (8 out of 17 with capsid genes identified) and included in the phylogenetic  
309 analyses. The (pro)phage identified in this study as well as the Absconditabacteria phage were assigned to  
310 either the *Podoviridae* clade or the *Siphoviridae* clade (Figure 3). The complete Saccharibacteria phage that  
311 lacks an identifiable capsid protein (Dudek et al. 2017) is most closely related to *Siphoviridae* phages based on  
312 comparison of its terminase with annotated sequences in the NCBI database.

313 One scaffold (QZM\_B3\_scaffold\_44) from a C2-Gp3 Roizmanbacteria was targeted by multiple  
314 spacers. Detailed analyses indicate that this region is a prophage, with a length of approximately 27 kbp (Figure  
315 2c), and is among the first prophage reported in CPR bacterial genomes. This prophage is predicted to encode  
316 40 protein coding genes, including a phage integrase, terminase, prohead protein, major tail protein, tail tape  
317 measure protein, tail fiber protein and lysozyme. Nineteen of the ORFs were targeted by 41 CRISPR spacers  
318 from CasY-based systems, all of which were from Roizmanbacteria (Figure 1, Figure 4b). BLAST comparison  
319 detected highly similar scaffolds in the other three genomes of the C2-Gp3 group (Table 1, Figure 2) and also  
320 unbinned scaffolds in QZM\_A2\_1, QZM\_A2\_3 and QZM\_A3, suggesting that this is a common Roizmanbacteria  
321 prophage. However, when reads of other QZM-related samples were mapped to QZM\_B3\_scaffold\_44, the  
322 prophage region showed much higher coverage in QZM\_B1 and QZM\_B4 than the flanking region  
323 (Supplementary Figure 5). Further, a subset of reads that circularize the phage genome were detected. These  
324 observations indicate that the prophage existed as phage particles in these two samples.

325 One putative phage scaffold (Supplementary Table 5) could be circularized, and circularization of the  
326 genome was confirmed by paired-end read mapping. The length of complete phage genome  
327 QZM\_A2\_Phage\_33\_19 is 31,813 bp, with a GC content of 32.9% (Figure 4a). Another two scaffolds  
328 (Supplementary Table 5) were manually curated to generate another complete phage genome  
329 QZM\_B3\_Phage\_33\_79, with a length of 30,824 bp and GC content of 32.5% (Figure 4b). Phage  
330 QZM\_A2\_Phage\_33\_19 and QZM\_B3\_Phage\_33\_79 share high sequence similarity, and they are probably  
331 closely related strains.

332 A total of 53 and 52 open reading frames (ORFs) were predicted from QZM\_A2\_Phage\_33\_19 and  
333 QZM\_B3\_Phage\_33\_79, respectively (Figures 4a and b, Supplementary Figure 6). Of these, 46 shared an  
334 average amino acid identity of 98%. ORFs common to both phage encode capsid, terminase, lysozyme and tail  
335 proteins. Although these two genomes are highly similar, 7 and 6 non-shared ORFs were detected in  
336 QZM\_A2\_Phage\_33\_19 and QZM\_B3\_Phage\_33\_79, respectively. Among those 13 non-shared ORFs, 4 are  
337 related to phage replication (Figures 3a and b), including one replication protein in QZM\_A2\_Phage\_33\_19,  
338 and one transcriptional regulator and two replication proteins in QZM\_B3\_Phage\_33\_79. We used the  
339 divergent region between the two genomes to calculate the coverage of the phage in all QZM-related samples  
340 and found that they co-occur in most samples (Figure 4c).

341 A total of 63 spacers targeted 26 ORFs in QZM\_A2\_Phage\_33\_19, and 52 spacers targeted 22 ORFs in  
342 QZM\_B3\_Phage\_33\_79 (Figures 4a and b), but no spacers targeted the intergenic regions of the two phage

343 genomes. The majority of spacers with targets (49 and 39, respectively) were from the CRISPR-CasY systems in  
344 QZM Roizmanbacteria genomes, and all the other targeting spacers were from the Type I-B and III-A systems of  
345 C2-Gp7. No spacer from QZM\_B4\_Woesebacteria\_36\_36 (78 unique spacers) and the other 10 type III-A  
346 systems targeted the two complete phage genomes.

347 For phylogenetic analyses, we searched the NCBI database for capsid proteins similar to those in the  
348 genomes reported here (Figure 3) and identified a scaffold containing a similar capsid ORF that was binned into  
349 a Roizmanbacteria genome (Candidatus Roizmanbacteria bacterium RIFOXYA1\_FULL\_41\_12; (Anantharaman et  
350 al. 2016)) (Supplementary Figure 2). Comparative analyses showed a close relationship between the sequences  
351 of this prophage and the two complete phages mentioned above, including homologies for the capsid and two  
352 terminase proteins. In addition, these genes and several other hypothetical proteins share gene arrangements  
353 (Supplementary Figure 6). Thus, we conclude the two phage genomes reported are the full sequences for  
354 lysogenic (temperate) phage found in Roizmanbacteria genomes.

355

### 356 **An unusual CRISPR-CasY system with a fragmented CasY effector and self-targeting spacers**

357 Among the candidate CasY sequences from the Tibet hot springs predicted protein dataset were three adjacent  
358 partial proteins on a scaffold from sample GD2\_1. In combination, the three open reading frames appear to  
359 comprise a fragmented CasY protein (defined as "fCasY"). We identified Cas1 and a CRISPR locus adjacent to  
360 the fCasY (Figure 5a). Read mapping to the scaffold revealed that the CasY was fragmented by two mutations.  
361 One involves deletion of A (from "AAAAA" to "AAAA") and introduces a TAA stop codon five amino acids  
362 downstream. This mutation occurred in all the mapped reads, indicating that all the cells have CasY fragmented  
363 at this position. The second mutation is a single nucleotide substitution from "C" to "T", which introduces a TAA  
364 stop codon. This mutation was detected in 82% of the mapped reads. Interestingly, however, the three  
365 conserved motifs (RuvC-I, -II and -III) are preserved in the largest protein fragment and all the catalytic residues  
366 are shared with functional CasY proteins (Figure 1b and Figure 5a). We identified the ribosome binding site  
367 (RBS) for fragments 1 and 2 as TAA, the same RBS associated with 353 of 946 ORFs of this Roizmanbacteria  
368 genome. The longest fragment is predicted to have a RBS of AAT, which was only shared by 55 ORFs.

369 The fCasY locus includes 22 unique spacers, six of which were detected only once in the mapped  
370 reads (Figure 5b). We reconstructed the CRISPR locus (Figure 5b) and found that all of the single copy spacers  
371 are at the locus end that is closest to the Cas1 protein. As in prior studies, we infer that these were recently  
372 added to the diversifying end of the CRISPR locus in a subset of cells. Interestingly, 12 out of the 22 unique  
373 spacers target the scaffolds of the C2-Gp5 genome, which encodes the fCasY system (Figure 5c, Supplementary  
374 Table 6). In detail, 11 spacers targeted Roizmanbacteria genes, including those encoding a PINc domain  
375 ribonuclease, two permeases, a sigma-70 RNA polymerase and three hypothetical proteins with  
376 transmembrane domains. Only one spacer matched an intergenic region, which is next to two tRNAs (His and  
377 Thr). This spacer was recently acquired, as it is encoded on three reads that also sampled part of the leader  
378 sequence (Figure 5b, Supplementary Table 6). Several of the self-targeting spacers are located in the old end of  
379 the locus (Figure 5b) and occurred in majority of the cells in the population. Thus, we infer that  
380 Roizmanbacteria with these self-targeting spacers have survived for a substantial period of time.

381 In addition to the fCasY locus, we identified type III-A and I-B CRISPR-Cas systems in the C2-Gp5  
382 genome. Notably, one spacer from the type III-A and I-B systems and two fCasY spacers target a complete  
383 34,706 bp phage genome GD2\_3\_Phage\_34\_19 (Supplementary Figure 7, Supplementary Table 6) assigned to  
384 *Podoviridae*. A Cas4-like protein was detected in this phage genome (Supplementary Figure 7). As phage with  
385 Cas4-like proteins can induce their hosts to acquire self-targeting spacers (Hooton and Connerton 2014), the  
386 presence of this protein may explain acquisition of self-targeting spacers by the C2-Gp5 genome.

387 Spacers from the loci of C2-Gp5 target other putative phage scaffolds (Supplementary Table 5). For  
388 example, one fCasY spacer targets GD2\_3\_scaffold\_2486, which encodes a putative phage gene. Spacers from  
389 both fCasY and I-B systems target GD2\_2\_scaffold\_18083, which encodes a phage tail tape measure protein.  
390 Two spacers from the type I-B system target GD2\_3\_scaffold\_517, which encodes a capsid protein that is  
391 distantly related to that in the prophage of C2-Gp3 (Figure 3).

392

### 393 **PAMs 5'-TA and 5'-TG are shared by systems with both CasY and fCasY**

394 The PAM is used for the acquisition of spacers into the CRISPR array and is important for target recognition and  
395 cleavage (Hille et al. 2018). We determined the probable PAM of the CasY systems reported here to target the  
396 two complete phage genomes (QZM\_A2\_Phage\_33\_19 and QZM\_B3\_Phage\_33\_79). Among all the 39 unique  
397 target locations on these two phage genomes (88 spacers in total), 20 had a potential 5' TA PAM and 14 had a  
398 potential 5' TG PAM (Supplementary Figure 8, Supplementary Table 6). Moreover, the one spacer in the  
399 CRISPR-CasY system of the C1-Gp1 genome that targets GD2\_3\_Phage\_34\_19 also has a 5' TA PAM

400 (Supplementary Figure 7). Previously, the PAM determined for the CasY.1 of *Candidatus* Katanobacteria using  
401 an *in vitro* approach was a 5' TA, and both 5' TA (dominant) and 5' TG PAMs occur, based on *in vivo* data  
402 (Burstein et al. 2017). For the fCasY, we checked to see if the self-targeting spacers have the same PAM as that  
403 of other CasY proteins. If this was not the case, the genomic region matching the spacer may not be recognized  
404 as a target by the fCasY CRISPR system. Among the 12 self-targeting spacers, 7 have 5' TA and 4 have 5' TG  
405 PAMs and one has a possible 5' AT PAM (Supplementary Table 6). Among the 5 fCasY spacers targets on phage  
406 scaffolds, two have 5' TA PAMs and two have 5' TG PAMs.

407 In combination the results indicate that both general CasY proteins and fCasY in this study use the 5'  
408 TA/TG PAM sequences for spacer acquisition and protospacer recognition. We identified a few targets with  
409 other PAM sequences (Supplementary Table 6), but it is possible that these targets have mutated the PAM  
410 sites during their evolutionary history, as previously documented (Paez-Espino et al. 2015).

411

#### 412 **Potential phage-host genetic interactions**

413 When examining the genomic context of CRISPR-CasY systems we noted four very short genes located next to  
414 the CRISPR array in the C2-Gp7 genome (Supplementary Figure 9). All four genes had at least one homologue in  
415 the three complete phage and one prophage (BLASTp e-value thresholds = 1e-5) and when two or more  
416 homologues were identified in the same genome, they were together. However, homologues were not  
417 identified in the other newly reconstructed and previously reported Roizmanbacteria genomes (Supplementary  
418 Table 4). The four genes in the C2-Gp7 genome and phage and prophage shared > 83% (up to 99%) nucleotide  
419 identity with > 80% alignment coverage, but none had a NCBI blast hit with similarity > 38% (> 50 alignment  
420 coverage). Given this, and the deduction that QZM\_A2\_Phage\_33\_19 and QZM\_B3\_Phage\_33\_79 infect C2-  
421 Gp7 Roizmanbacteria (based on CRISPR spacer targeting), we conclude that there may have been lateral  
422 transfer of novel proteins related to phage-host interactions between Roizmanbacteria and their phage.

423

#### 424 **Discussion**

425 CPR bacteria account for a huge amount of diversity within the Bacterial domain, but the mechanisms of their  
426 interactions with phage and the phage that infect them have remained largely undocumented. In part, this is  
427 due to scant information about their CRISPR-Cas systems, despite extensive genomic sampling from a wide  
428 variety of sites in nature (Burstein et al. 2016, 2017; Dudek et al. 2017; Castelle and Banfield 2018). In this  
429 study, we report an unexpected diversity of CRISPR-Cas systems in the genomes of bacteria from the CPR  
430 phylum of Roizmanbacteria, both from newly reconstructed sequences from multiple hot spring sediments of  
431 Tibet, China (Supplementary Table 1) and some previously published genomes. Most of them are CasY-based  
432 systems (Figure 1a, Table 1). These new sequences constrain more and less highly conserved regions of CasY  
433 proteins, information that may be important in future efforts directed at tailoring the properties of genome-  
434 editing enzymes.

435 The finding that some of the Roizmanbacteria genomes encode multiple CRISPR-Cas systems,  
436 including the relatively large types I-B and III-A, is unexpected, given the overall paucity of systems in CPR  
437 bacteria, and their small genome sizes (Figure 1b). We infer that these systems are mostly active, given the  
438 identification of targets on potential phage scaffolds and evidence for locus diversification. Considering that  
439 majority of the spacers with targets on the three complete phage and one prophage were from CRISPR-CasY  
440 systems (Figures 2d, and 4a and b), it seems that CasY is the primary CRISPR-Cas system used by these bacteria  
441 for phage defense. In the case of the Roizmanbacteria with only a degenerate Type III-A CRISPR-Cas system,  
442 defense may rely upon a restriction-modification system, as suggested previously for CPR bacteria that lack any  
443 CRISPR-Cas system (Burstein et al. 2016) (Figure 2). In support of this correlation, restriction-modification  
444 systems were not detected in those Roizmanbacteria with seemingly functional CRISPR-Cas systems (Figure 1a).  
445 The discovery of two copies Cas12a proteins in a single system of two genomes is an additional case of  
446 unexpected investment in CRISPR-Cas-based phage defense by CPR bacteria (Figure 1a, Supplementary Figure  
447 2). Overall, the genomes of Roizmanbacteria contained three of the six types of CRISPR-Cas systems reported  
448 so far (i.e. type I, III and V), expanding our understanding of the investment of CPR bacteria in CRISPR-Cas-  
449 based defense.

450 The availability of a pool of CRISPR spacers enabled discovery of three Roizmanbacteria-infecting  
451 phage for which complete genomes were reconstructed, and one prophage (Figures 2-4, Supplementary Figure  
452 7). These are the first reported phage infecting members of the Microgenomates superphylum of the CPR. All  
453 of these phage, along with the previously reported CPR phage, were assigned to *Podoviridae* and *Siphoviridae*  
454 of the *Caudovirales* order (Figure 3). The phylogenetic relatedness and genetic similarity among the  
455 *Podoviridae* phages obtained in this study and a Roizmanbacteria prophage deposited at NCBI (Figure 3,  
456 Supplementary Figure 6), and also the potential phage-host genetic interactions (Supplementary Figure 9), may



457 indicate stable and similar host-phage relationships in a variety of habitats.

458 An interesting aspect of the CRISPR-CasY analyses was the fCasY system in one Roizmanbacteria that  
459 includes a locus with self-targeting spacers. It may be significant that a Cas4-like protein is encoded in the  
460 genome of a phage that replicates in this Roizmanbacteria, given that a Cas4-like protein in a *Campylobacter* sp.  
461 phage was suggested to facilitate acquisition of self-targeting spacers into the CRISPR-Cas system of its host  
462 (Hooton and Connerton 2014). Roizmanbacteria lack the RecBCD mediated double-stranded DNA break repair  
463 complex, the only documented mechanism for avoidance of self-targeting spacer acquisition (Levy et al. 2015).  
464 Thus, it is plausible that the phage-encoded Cas4-like protein led to acquisition of the self-targeting spacers,  
465 which should result in autoimmunity (Stern et al. 2010).

466 Autoimmunity can be avoided via loss of cas genes, mutated repeats adjacent to self-targeting  
467 spacers, extended base-pairing with the upstream flanking repeat, and the absence of a PAM in the  
468 chromosomal region matched by the spacer (Stern et al. 2010), none of which were observed here.  
469 Autoimmunity also could be countered via loss of cas gene function. Interestingly, the fCasY harboured  
470 conserved RuvC domains and catalytic residues found in intact CasY proteins (Figure 1b, Figure 5). However,  
471 given the relatively high abundance of Roizmanbacteria with fCasY in the community (1.37%), we infer that the  
472 fCasY protein fragmentation led to loss of cleavage function, preventing autoimmunity. It is possible that the  
473 region of the fCasY protein responsible for binding to the target sequence is encoded on a different gene  
474 fragment than that encoding the nuclease domain, so that the CRISPR RNA does not recruit the protein  
475 fragment with nuclease function.

476 The presence of old end CRISPR locus spacers that target the host chromosome suggests that the  
477 fCasY has been present in the genomes of the Roizmanbacteria C2-Gp5 population for some time. Why has this  
478 gene, or the entire locus, not been lost? It is possible that the spacers of the fCasY locus retain some function,  
479 for example in gene regulation (possibly involving binding of CRISPR RNAs to the DNA during transcription).  
480 Experiments will be required to determine whether fragments of fCasY can reassemble and bind to the  
481 genomic regions targeted by the self-targeting spacers (without cleavage) and to determine if the spacer-  
482 directed binding domain is on fragment 1 or 2 (Figure 5a).

483 In conclusion, CRISPR-Cas systems are unexpectedly common in a subset of CPR bacteria, and the  
484 number, variety and potential functional diversity of these systems is greater than expected. It is already  
485 established that CRISPR-CasY systems from these intriguing and enigmatic bacteria will have biotechnological  
486 value. Lessons from natural system studies such as reported here may provide information about CasY  
487 sequence variety and function that may be useful in enzyme engineering. Beyond this, the new information  
488 about CPR bacteria, their phage and the mechanisms of their interactions expands our understanding of the  
489 complex phenomena that shape the structure and functioning of natural microbial communities.

#### 490 491 **Author contributions**

492 L.X.C. and J.F.B. designed the study. W.J.L. supported for the metagenomic sequencing. L.X.C. performed the  
493 metagenomic assembly, HMM search and scaffold extension and curation. L.X.C. and J.F.B. performed genome  
494 binning and curation. L.X.C. and J.F.B. conducted data analyses with input from B.A.S. and R.M.. L.X.C. and J.F.B.  
495 wrote the manuscript. All authors read and approved the final manuscript.

#### 496 497 **Acknowledgement**

498 This research was supported by the Microbiology Program of the Innovative Genomics Institute. W.J.L. was  
499 financially supported by the Science and Technology Infrastructure work project (No. 2015FY110100), and the  
500 Natural Science Foundation of Guangdong Province, China (No. 2016A030312003). B.A.S is supported by the  
501 National Science Foundation Graduate Research Fellowship.

#### 502 503 **Conflict of interest**

504 J.A.D. is a co-founder of Caribou Biosciences, Editas Medicine, Intellia Therapeutics, Scribe Therapeutics, and  
505 Mammoth Biosciences. J.A.D. is a scientific advisory board member of Caribou Biosciences, Intellia  
506 Therapeutics, eFFECTOR Therapeutics, Scribe Therapeutics, Synthego, Metagenomi, Mammoth Biosciences and  
507 Inari. J.A.D is a member of the board of directors at Driver and Johnson & Johnson and has sponsored research  
508 projects by Roche Biopharma and Biogen.

#### 509 510 **References**

511 Anantharaman, Karthik, Christopher T. Brown, Laura A. Hug, Itai Sharon, Cindy J. Castelle, Alexander J. Probst,  
512 Brian C. Thomas, et al. 2016. "Thousands of Microbial Genomes Shed Light on Interconnected

- 513 Biogeochemical Processes in an Aquifer System." *Nature Communications* 7: 13219.
- 514 Andersson, Anders F., and Jillian F. Banfield. 2008. "Virus Population Dynamics and Acquired Virus Resistance in  
515 Natural Microbial Communities." *Science* 320 (5879): 1047–50.
- 516 Bankevich, Anton, Sergey Nurk, Dmitry Antipov, Alexey A. Gurevich, Mikhail Dvorkin, Alexander S. Kulikov,  
517 Valery M. Lesin, et al. 2012. "SPAdes: A New Genome Assembly Algorithm and Its Applications to Single-  
518 Cell Sequencing." *Journal of Computational Biology: A Journal of Computational Molecular Cell Biology* 19  
519 (5): 455–77.
- 520 Brown, Christopher T., Laura A. Hug, Brian C. Thomas, Itai Sharon, Cindy J. Castelle, Andrea Singh, Michael J.  
521 Wilkins, Kelly C. Wrighton, Kenneth H. Williams, and Jillian F. Banfield. 2015. "Unusual Biology across a  
522 Group Comprising More than 15% of Domain Bacteria." *Nature* 523 (7559): 208–11.
- 523 Burstein, David, Lucas B. Harrington, Steven C. Strutt, Alexander J. Probst, Karthik Anantharaman, Brian C.  
524 Thomas, Jennifer A. Doudna, and Jillian F. Banfield. 2017. "New CRISPR-Cas Systems from Uncultivated  
525 Microbes." *Nature* 542 (7640): 237–41.
- 526 Burstein, David, Christine L. Sun, Christopher T. Brown, Itai Sharon, Karthik Anantharaman, Alexander J. Probst,  
527 Brian C. Thomas, and Jillian F. Banfield. 2016. "Major Bacterial Lineages Are Essentially Devoid of CRISPR-  
528 Cas Viral Defence Systems." *Nature Communications* 7 (February): 10613.
- 529 Capella-Gutiérrez, Salvador, José M. Silla-Martínez, and Toni Gabaldón. 2009. "trimAl: A Tool for Automated  
530 Alignment Trimming in Large-Scale Phylogenetic Analyses." *Bioinformatics* 25 (15): 1972–73.
- 531 Castelle, Cindy J., and Jillian F. Banfield. 2018. "Major New Microbial Groups Expand Diversity and Alter Our  
532 Understanding of the Tree of Life." *Cell* 172 (6): 1181–97.
- 533 Castelle, Cindy J., Christopher T. Brown, Karthik Anantharaman, Alexander J. Probst, Raven H. Huang, and Jillian  
534 F. Banfield. 2018. "Biosynthetic Capacity, Metabolic Variety and Unusual Biology in the CPR and DPANN  
535 Radiations." *Nature Reviews. Microbiology* 16 (10): 629–45.
- 536 Chen, Janice S., and Jennifer A. Doudna. 2017. "The Chemistry of Cas9 and Its CRISPR Colleagues." *Nature  
537 Reviews Chemistry* 1 (10): 0078.
- 538 Crooks, G. E., G. Hon, J. M. Chandonia, and S. E. Brenner. 2004. "WebLogo: A Sequence Logo Generator."  
539 *Genome Research* 14 (6): 1188–90.
- 540 Dick, Gregory J., Anders F. Andersson, Brett J. Baker, Sheri L. Simmons, Brian C. Thomas, A. Pepper Yelton, and  
541 Jillian F. Banfield. 2009. "Community-Wide Analysis of Microbial Genome Sequence Signatures." *Genome  
542 Biology* 10 (8): R85.
- 543 Dudek, Natasha K., Christine L. Sun, David Burstein, Rose S. Kantor, Daniela S. Aliaga Goltsman, Elisabeth M.  
544 Bik, Brian C. Thomas, Jillian F. Banfield, and David A. Relman. 2017. "Novel Microbial Diversity and  
545 Functional Potential in the Marine Mammal Oral Microbiome." *Current Biology: CB* 27 (24): 3752–62.e6.
- 546 Eddy, S. R. 1998. "Profile Hidden Markov Models." *Bioinformatics* 14 (9): 755–63.
- 547 Edgar, Robert C. 2004. "MUSCLE: Multiple Sequence Alignment with High Accuracy and High Throughput."  
548 *Nucleic Acids Research* 32 (5): 1792–97.
- 549 Grissa, Ibtissem, Patrick Bouchon, Christine Pourcel, and Gilles Vergnaud. 2008. "On-Line Resources for  
550 Bacterial Micro-Evolution Studies Using MLVA or CRISPR Typing." *Biochimie* 90 (4): 660–68.
- 551 Hille, Frank, Hagen Richter, Shi Pey Wong, Majda Bratovič, Sarah Ressel, and Emmanuelle Charpentier. 2018.  
552 "The Biology of CRISPR-Cas: Backward and Forward." *Cell* 172 (6): 1239–59.
- 553 Hooton, Steven P. T., and Ian F. Connerton. 2014. "Campylobacter Jejuni Acquire New Host-Derived CRISPR  
554 Spacers When in Association with Bacteriophages Harboring a CRISPR-like Cas4 Protein." *Frontiers in  
555 Microbiology* 5: 744.
- 556 Hug, Laura A., Brett J. Baker, Karthik Anantharaman, Christopher T. Brown, Alexander J. Probst, Cindy J.  
557 Castelle, Cristina N. Butterfield, et al. 2016. "A New View of the Tree of Life." *Nature Microbiology* 1  
558 (April): 16048.
- 559 Hyatt, Doug, Gwo-Liang Chen, Philip F. Locascio, Miriam L. Land, Frank W. Larimer, and Loren J. Hauser. 2010.  
560 "Prodigal: Prokaryotic Gene Recognition and Translation Initiation Site Identification." *BMC Bioinformatics*  
561 11 (March): 119.
- 562 Langmead, Ben, and Steven L. Salzberg. 2012. "Fast Gapped-Read Alignment with Bowtie 2." *Nature Methods* 9  
563 (4): 357–59.
- 564 Letunic, I., and P. Bork. 2006. "Interactive Tree Of Life (iTOL): An Online Tool for Phylogenetic Tree Display and  
565 Annotation." *Bioinformatics* 23 (1): 127–28.
- 566 Levy, Asaf, Moran G. Goren, Ido Yosef, Oren Auster, Miriam Manor, Gil Amitai, Rotem Edgar, Udi Qimron, and  
567 Rotem Sorek. 2015. "CRISPR Adaptation Biases Explain Preference for Acquisition of Foreign DNA." *Nature  
568* 520 (7548): 505–10.
- 569 Luef, Birgit, Kyle R. Frischkorn, Kelly C. Wrighton, Hoi-Ying N. Holman, Giovanni Birarda, Brian C. Thomas,

- 570 Andrea Singh, et al. 2015. "Diverse Uncultivated Ultra-Small Bacterial Cells in Groundwater." *Nature*  
571 *Communications* 6 (1). <https://doi.org/10.1038/ncomms7372>.
- 572 Nuñez, James K., Philip J. Kranzusch, Jonas Noeske, Addison V. Wright, Christopher W. Davies, and Jennifer A.  
573 Doudna. 2014. "Cas1–Cas2 Complex Formation Mediates Spacer Acquisition during CRISPR–Cas Adaptive  
574 Immunity." *Nature Structural & Molecular Biology* 21 (6): 528–34.
- 575 Olm, Matthew R., Christopher T. Brown, Brandon Brooks, and Jillian F. Banfield. 2017. "dRep: A Tool for Fast  
576 and Accurate Genomic Comparisons That Enables Improved Genome Recovery from Metagenomes  
577 through de-Replication." *The ISME Journal* 11 (12): 2864–68.
- 578 Paez-Espino, David, Emiley A. Eloë-Fadrosh, Georgios A. Pavlopoulos, Alex D. Thomas, Marcel Huntemann,  
579 Natalia Mikhailova, Edward Rubin, Natalia N. Ivanova, and Nikos C. Kyrpides. 2016. "Uncovering Earth's  
580 Virome." *Nature* 536 (7617): 425–30.
- 581 Paez-Espino, David, Itai Sharon, Wesley Morovic, Buffy Stahl, Brian C. Thomas, Rodolphe Barrangou, and Jillian  
582 F. Banfield. 2015. "CRISPR Immunity Drives Rapid Phage Genome Evolution in *Streptococcus*  
583 *Thermophilus*." *mBio* 6 (2). <https://doi.org/10.1128/mBio.00262-15>.
- 584 Parks, Donovan H., Christian Rinke, Maria Chuvochina, Pierre-Alain Chaumeil, Ben J. Woodcroft, Paul N. Evans,  
585 Philip Hugenholtz, and Gene W. Tyson. 2017. "Recovery of Nearly 8,000 Metagenome-Assembled  
586 Genomes Substantially Expands the Tree of Life." *Nature Microbiology* 2 (11): 1533–42.
- 587 Pruesse, Elmar, Jörg Peplies, and Frank Oliver Glöckner. 2012. "SINA: Accurate High-Throughput Multiple  
588 Sequence Alignment of Ribosomal RNA Genes." *Bioinformatics* 28 (14): 1823–29.
- 589 Pruesse, Elmar, Christian Quast, Katrin Knittel, Bernhard M. Fuchs, Wolfgang Ludwig, Jörg Peplies, and Frank  
590 Oliver Glöckner. 2007. "SILVA: A Comprehensive Online Resource for Quality Checked and Aligned  
591 Ribosomal RNA Sequence Data Compatible with ARB." *Nucleic Acids Research* 35 (21): 7188–96.
- 592 Schulz, Frederik, Emiley A. Eloë-Fadrosh, Robert M. Bowers, Jessica Jarett, Torben Nielsen, Natalia N. Ivanova,  
593 Nikos C. Kyrpides, and Tanja Woyke. 2017. "Towards a Balanced View of the Bacterial Tree of Life."  
594 *Microbiome* 5 (1): 140.
- 595 Shmakov, Sergey, Omar O. Abudayyeh, Kira S. Makarova, Yuri I. Wolf, Jonathan S. Gootenberg, Ekaterina  
596 Semenova, Leonid Minakhin, et al. 2015. "Discovery and Functional Characterization of Diverse Class 2  
597 CRISPR-Cas Systems." *Molecular Cell* 60 (3): 385–97.
- 598 Song, Zhao-Qi, Feng-Ping Wang, Xiao-Yang Zhi, Jin-Quan Chen, En-Min Zhou, Feng Liang, Xiang Xiao, et al. 2012.  
599 "Bacterial and Archaeal Diversities in Yunnan and Tibetan Hot Springs, China." *Environmental*  
600 *Microbiology* 15 (4): 1160–75.
- 601 Stamatakis, Alexandros. 2014. "RAxML Version 8: A Tool for Phylogenetic Analysis and Post-Analysis of Large  
602 Phylogenies." *Bioinformatics* 30 (9): 1312–13.
- 603 Stern, Adi, Leeat Keren, Omri Wurtzel, Gil Amitai, and Rotem Sorek. 2010. "Self-Targeting by CRISPR: Gene  
604 Regulation or Autoimmunity?" *Trends in Genetics: TIG* 26 (8): 335–40.
- 605 Westra, Edze R., Stineke van Houte, Sam Oyesiku-Blakemore, Ben Makin, Jenny M. Broniewski, Alex Best,  
606 Joseph Bondy-Denomy, Alan Davidson, Mike Boots, and Angus Buckling. 2015. "Parasite Exposure Drives  
607 Selective Evolution of Constitutive versus Inducible Defense." *Current Biology: CB* 25 (8): 1043–49.
- 608 Yarza, Pablo, Pelin Yilmaz, Elmar Pruesse, Frank Oliver Glöckner, Wolfgang Ludwig, Karl-Heinz Schleifer, William  
609 B. Whitman, Jean Euzéby, Rudolf Amann, and Ramon Rosselló-Móra. 2014. "Uniting the Classification of  
610 Cultured and Uncultured Bacteria and Archaea Using 16S rRNA Gene Sequences." *Nature Reviews.*  
611 *Microbiology* 12 (9): 635–45.
- 612 Zetsche, Bernd, Jonathan S. Gootenberg, Omar O. Abudayyeh, Ian M. Slaymaker, Kira S. Makarova, Patrick  
613 Essletzbichler, Sara E. Volz, et al. 2015. "Cpf1 Is a Single RNA-Guided Endonuclease of a Class 2 CRISPR-Cas  
614 System." *Cell* 163 (3): 759–71.

615  
616  
617  
618  
619  
620  
621  
622  
623  
624  
625

626 **Figure Legends**

627 **Figure 1. Roizmanbacteria and Woesebacteria genomes encode CRISPR-CasY and/or other CRISPR-Cas**  
628 **systems.** (a) CRISPR systems detected in genomes of CPR bacteria (top left), the phylogenetic classification of  
629 which was established based on concatenated sequences of 16 ribosomal proteins (top right). Included in the  
630 analyses are the dereplicated representatives of Roizmanbacteria and Woesebacteria genomes from this study  
631 (in red) and Roizmanbacteria genomes from NCBI (in black). CRISPR system types in each genome are indicated  
632 by the symbols after the genome names, and the number of non-redundant genomes is shown in brackets.  
633 Those clades without CRISPR-Cas are collapsed, and the number of genomes are shown (see Supplementary  
634 Figure 1 for the uncollapsed tree). The red arrow indicates the presence of a restriction-modification system,  
635 the hypothetical proteins are shown in white. (b) Phylogenetic analyses of CasY proteins, including those  
636 previously reported and those identified in this study. The local alignment of conserved motifs of CasY protein,  
637 including RuvC-I, -II, -III and helical, are shown. The catalytic residues are shown by white letters on a black  
638 background; for other residues, backgrounds of different colors are used if the amino acids are inconsistent  
639 among those CasY identified in this study.

640  
641 **Figure 2. Prophage and restriction modification systems are detected in the genomes of Roizmanbacteria C2-**  
642 **Gp3.** (a) Scaffold 44 includes prophage, a restriction-modification system and an apparently degenerate Type  
643 III-A CRISPR-Cas system. (b) The proteins in the restriction-modification system shown in (a). (c) Prophage  
644 genes targeted by spacers are shown in black and the number of spacers targeting each open reading frame is  
645 listed in brackets following the annotation. Genes not targeted by CRISPR spacers are shown in orange (top  
646 panel). The genome affiliations of spacers targeting the prophage are indicated in the bottom panel.

647  
648 **Figure 3. Phylogeny of capsid proteins used for taxonomic assignment of Roizmanbacteria-infecting phage**  
649 **(or prophage) in this study.** The Roizmanbacteria-infecting phage and prophage are shown in red, and those  
650 with spacer targets are indicated by triangles. Squares indicate phage determined to be similar based on their  
651 capsid protein sequences. The previously reported Absconditabacteria (SR1) phage are included for  
652 comparison.

653  
654 **Figure 4. Complete genomes of Roizmanbacteria-infecting phage.** The red rings represent (a)  
655 QZM\_A2\_Phage\_33\_19 and (b) QZM\_B3\_Phage\_33\_79 phage genomes. The open reading frames (ORFs) are  
656 shown outside the genomes, those targeted by at least one spacer are in black (genes not targeted are in  
657 orange). The total number of spacers that target each gene is listed in parentheses following the protein  
658 annotation. The spacers targeting the phage genome from a given CRISPR-Cas system are indicated by bars on  
659 the dotted inner rings (see Figure 1 for CRISPR-Cas system type). Bars are colored by genome of origin (see top  
660 right). The non-shared proteins between these two phage genomes are indicated by green circles and  
661 numbered, their annotations are shown at the right. Hyp, hypothetical protein. (c) The coverage information of  
662 these two phage genomes in QZM-related samples.

663  
664 **Figure 5. One Roizmanbacteria genome encodes an unusual CRISPR system with a fragmented CasY (fCasY)**  
665 **protein and self-targeting spacers.** (a) Mutations leading to fragmentation of CasY proteins into three pieces  
666 (red arrows) and their incidence in the population, and other features of the locus. (b) The reconstructed  
667 CRISPR locus showing the history of spacer acquisition and the distribution of self-targeted spacers (marked by  
668 red circles). (c) Scaffolds encoding genes and an intergenic region matching the self-targeting spacers. The  
669 targeted genes have the same color as the corresponding spacers in (b), genes targeted by single copy spacers  
670 (white in (b)) are indicated by numbers, and CRISPR-Cas systems, tRNA and other genes on the scaffolds are  
671 shown in gray.



**Table 1** Summary of Roizmanbacteria and Woesebacteria genomes reconstructed in this study. \*Representative genome of each group used in phylogenetic analyses. Figure 1 and Supplementary Figure 1 provide phylogeny and clade information.

| Clade      | Group                                  | Genome name                             | Genome size (kbp) | No. of scaffolds | CG%   | Bacterial 50 SCGs |               | No. of proteins              | CRISPR-Cas systems           | Prophage |
|------------|----------------------------------------|-----------------------------------------|-------------------|------------------|-------|-------------------|---------------|------------------------------|------------------------------|----------|
|            |                                        |                                         |                   |                  |       | Completeness      | Contamination |                              |                              |          |
|            |                                        | <b>QZM_B4_Woesebacteria_36_36 *</b>     | 621.6             | 41               | 35.66 | 50/50             | 0             | 706                          | CasY                         | No       |
| Clade 1    | 1 (C1-Gp1)                             | <b>GD2_1_Roizmanbacteria_31_27 *</b>    | 561.5             | 98               | 30.77 | 41/50             | 1/50          | 589                          | CasY                         | No       |
|            | 2 (C1-Gp2)                             | <b>QZM_A2_2_Roizmanbacteria_31_61 *</b> | 895.7             | 74               | 31.00 | 43/50             | 0             | 775                          | CasY                         | No       |
|            |                                        | QZM_A1_Roizmanbacteria_31_22            | 753.1             | 62               | 30.72 | 39/50             | 1/50          | 678                          |                              |          |
|            |                                        | QZM_A2_1_Roizmanbacteria_31_42          | 775.1             | 213              | 30.87 | 45/50             | 0             | 897                          |                              |          |
|            |                                        | QZM_A2_3_Roizmanbacteria_31_19          | 500.3             | 126              | 30.74 | 27/50             | 2/50          | 588                          |                              |          |
| Clade 2    | 3 (C2-Gp3)                             | <b>QZM_B3_Roizmanbacteria_33_70 *</b>   | 994.5             | 17               | 33.41 | 41/50             | 0             | 985                          | Type III-A (degenerate)      | Yes      |
|            |                                        | QZM_A1_Roizmanbacteria_33_14            | 822.0             | 125              | 33.30 | 40/50             | 1/50          | 978                          |                              |          |
|            |                                        | QZM_A2_Roizmanbacteria_33_14            | 860.2             | 109              | 33.24 | 45/50             | 2/50          | 1020                         |                              |          |
|            |                                        | QZM_A2_2_Roizmanbacteria_33_18          | 711.6             | 184              | 32.85 | 35/50             | 3/50          | 939                          |                              |          |
|            | 4 (C2-Gp4)                             | <b>DGJ11_Roizmanbacteria_31_22 *</b>    | 655.0             | 139              | 31.23 | 40/50             | 3/50          | 779                          | CasY + Type III-A            | No       |
|            | 5 (C2-Gp5)                             | <b>GD2_1_Roizmanbacteria_32_73 *</b>    | 906.7             | 20               | 32.28 | 45/50             | 2/50          | 946                          | CasY + Type III-A + Type I-B | No       |
|            | 6 (C2-Gp6)                             | <b>QZM_B1_Roizmanbacteria_33_36 *</b>   | 816.6             | 133              | 33.15 | 43/50             | 2/50          | 948                          | CasY + Type III-A            | No       |
|            |                                        | QZM_A1_Roizmanbacteria_33_28            | 647.1             | 82               | 33.16 | 42/50             | 3/50          | 740                          |                              |          |
|            |                                        | QZM_A2_1_Roizmanbacteria_33_40          | 645.2             | 208              | 33.37 | 38/50             | 4/50          | 835                          |                              |          |
|            |                                        | QZM_A2_2_Roizmanbacteria_33_54          | 792.5             | 150              | 32.83 | 36/50             | 3/50          | 947                          |                              |          |
| 7 (C2-Gp7) | <b>QZM_B4_Roizmanbacteria_33_372 *</b> | 891.6                                   | 13                | 33.22            | 46/50 | 0                 | 919           | CasY + Type III-A + Type I-B | No                           |          |

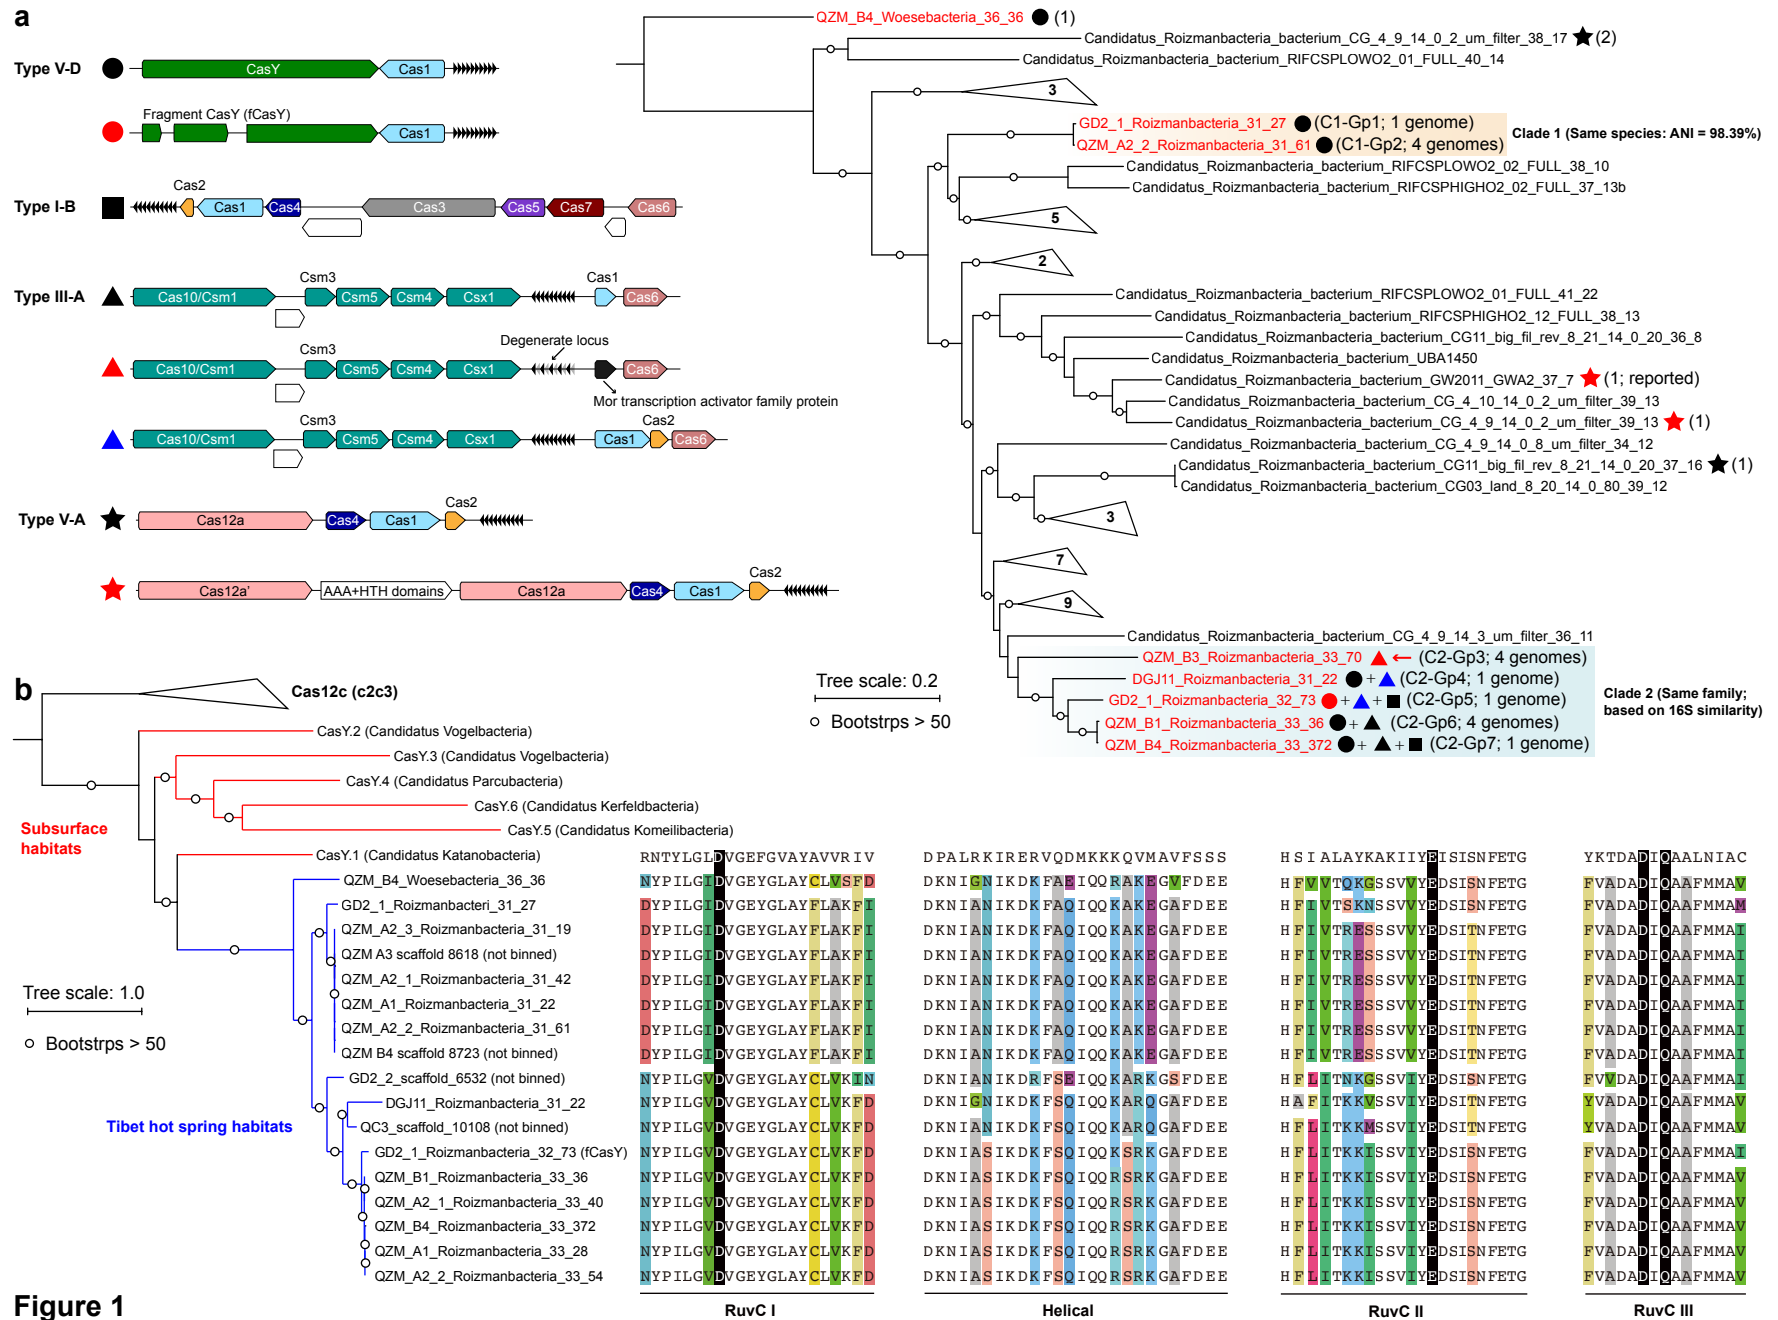

Figure 1

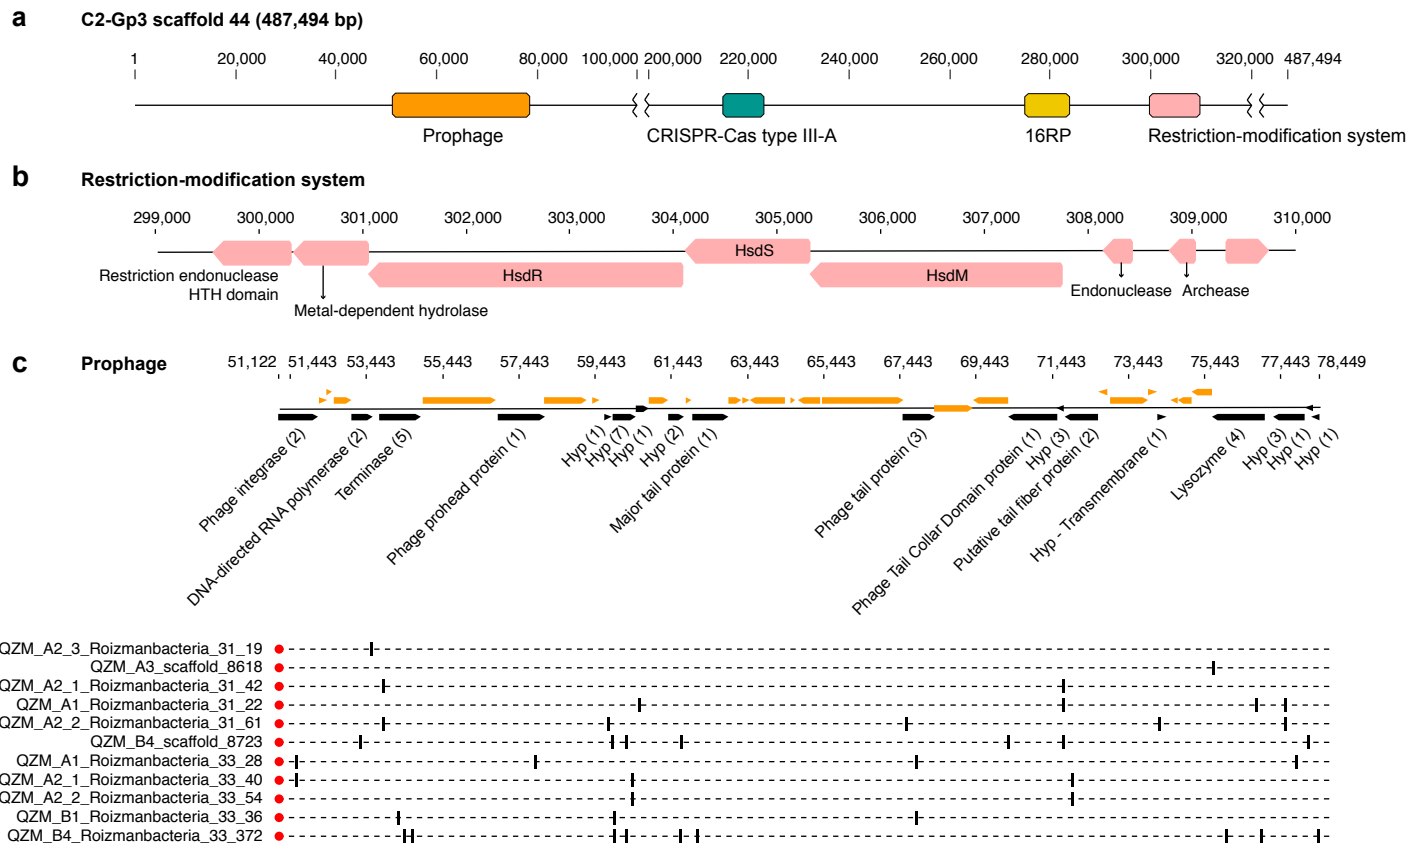

**Figure 2**

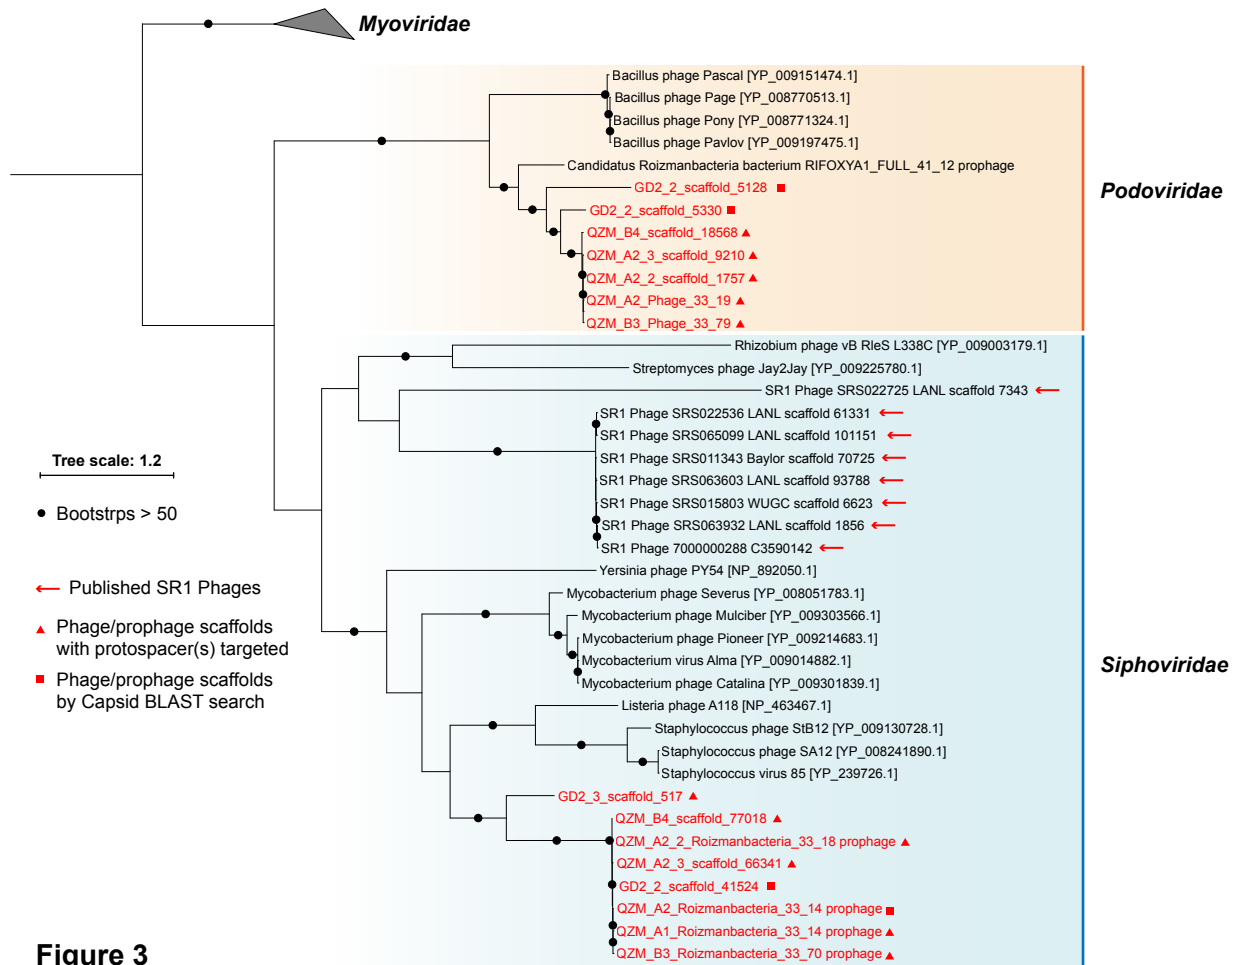

**Figure 3**



**a** QZM\_A2\_Phage\_33\_19\_curated\_complete (31,813 bp; GC = 32.9%)

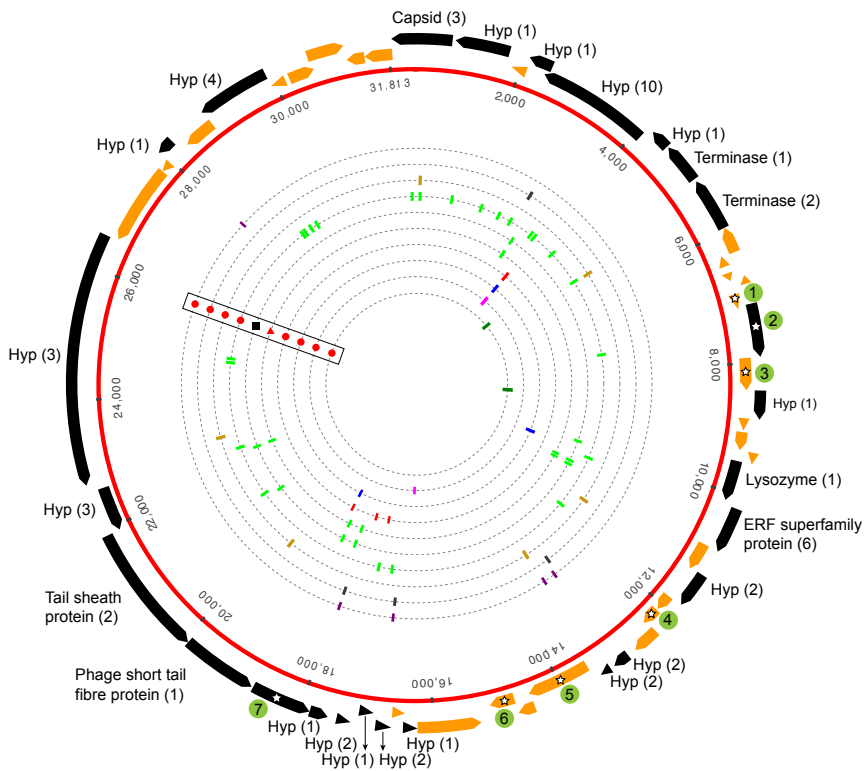

- QZM\_A2\_1\_Roizmanbacteria\_31\_42
- QZM\_A2\_2\_Roizmanbacteria\_31\_61
- QZM\_B4\_scaffold\_8723
- QZM\_B4\_Roizmanbacteria\_33\_372
- QZM\_A1\_Roizmanbacteria\_33\_28
- QZM\_A2\_1\_Roizmanbacteria\_33\_40
- QZM\_A2\_2\_Roizmanbacteria\_33\_54
- QZM\_B1\_Roizmanbacteria\_33\_36

**Non-shared ORFs in QZM\_A2\_Phage\_33\_19**

- 1 Tetratricopeptide (TPR) repeat
- 2 Firmicute plasmid replication protein (Repl) (1)
- 3 Hypothetical protein
- 4 Hypothetical protein
- 5 DNA methylase
- 6 RNase HI family domain protein
- 7 CHAP domain-containing protein (8)

**Non-shared ORFs in QZM\_B3\_Phage\_33\_79**

- 8 Transcriptional regulator
- 9 Bacteriophage replication protein O (1)
- 10 Tetratricopeptide protein
- 11 Phage replication protein
- 12 Hypothetical protein
- 13 Peptidase M23 family protein (2)

**b** QZM\_B3\_Phage\_33\_79\_curated\_complete (30,824 bp; GC = 32.5%)

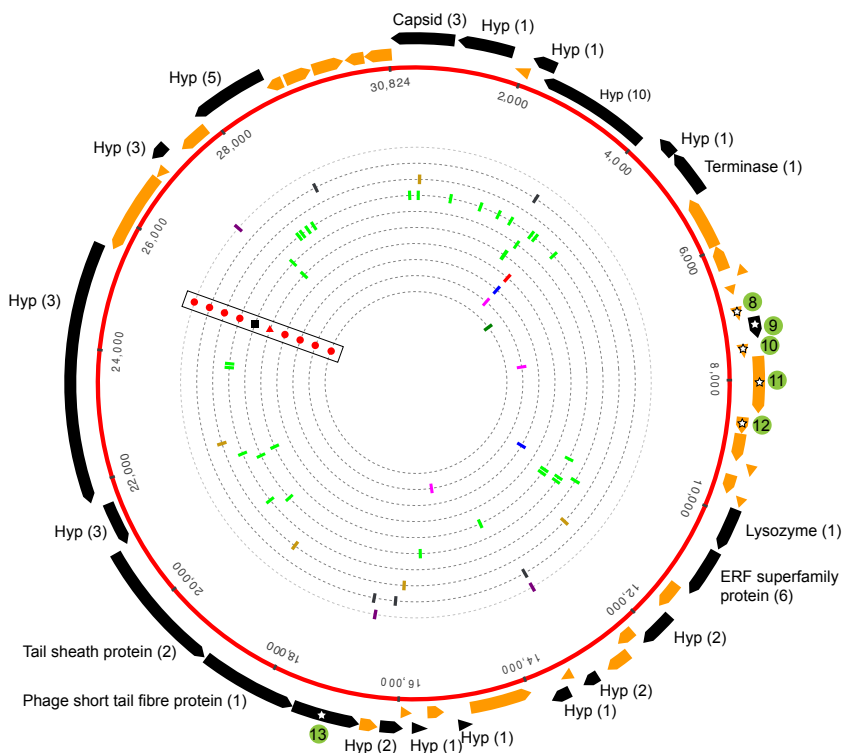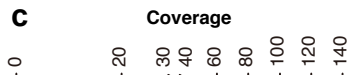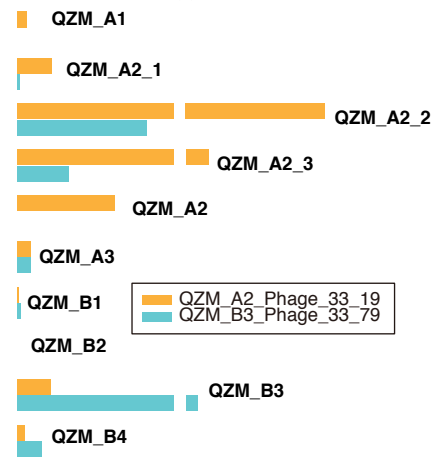

**Figure 4**

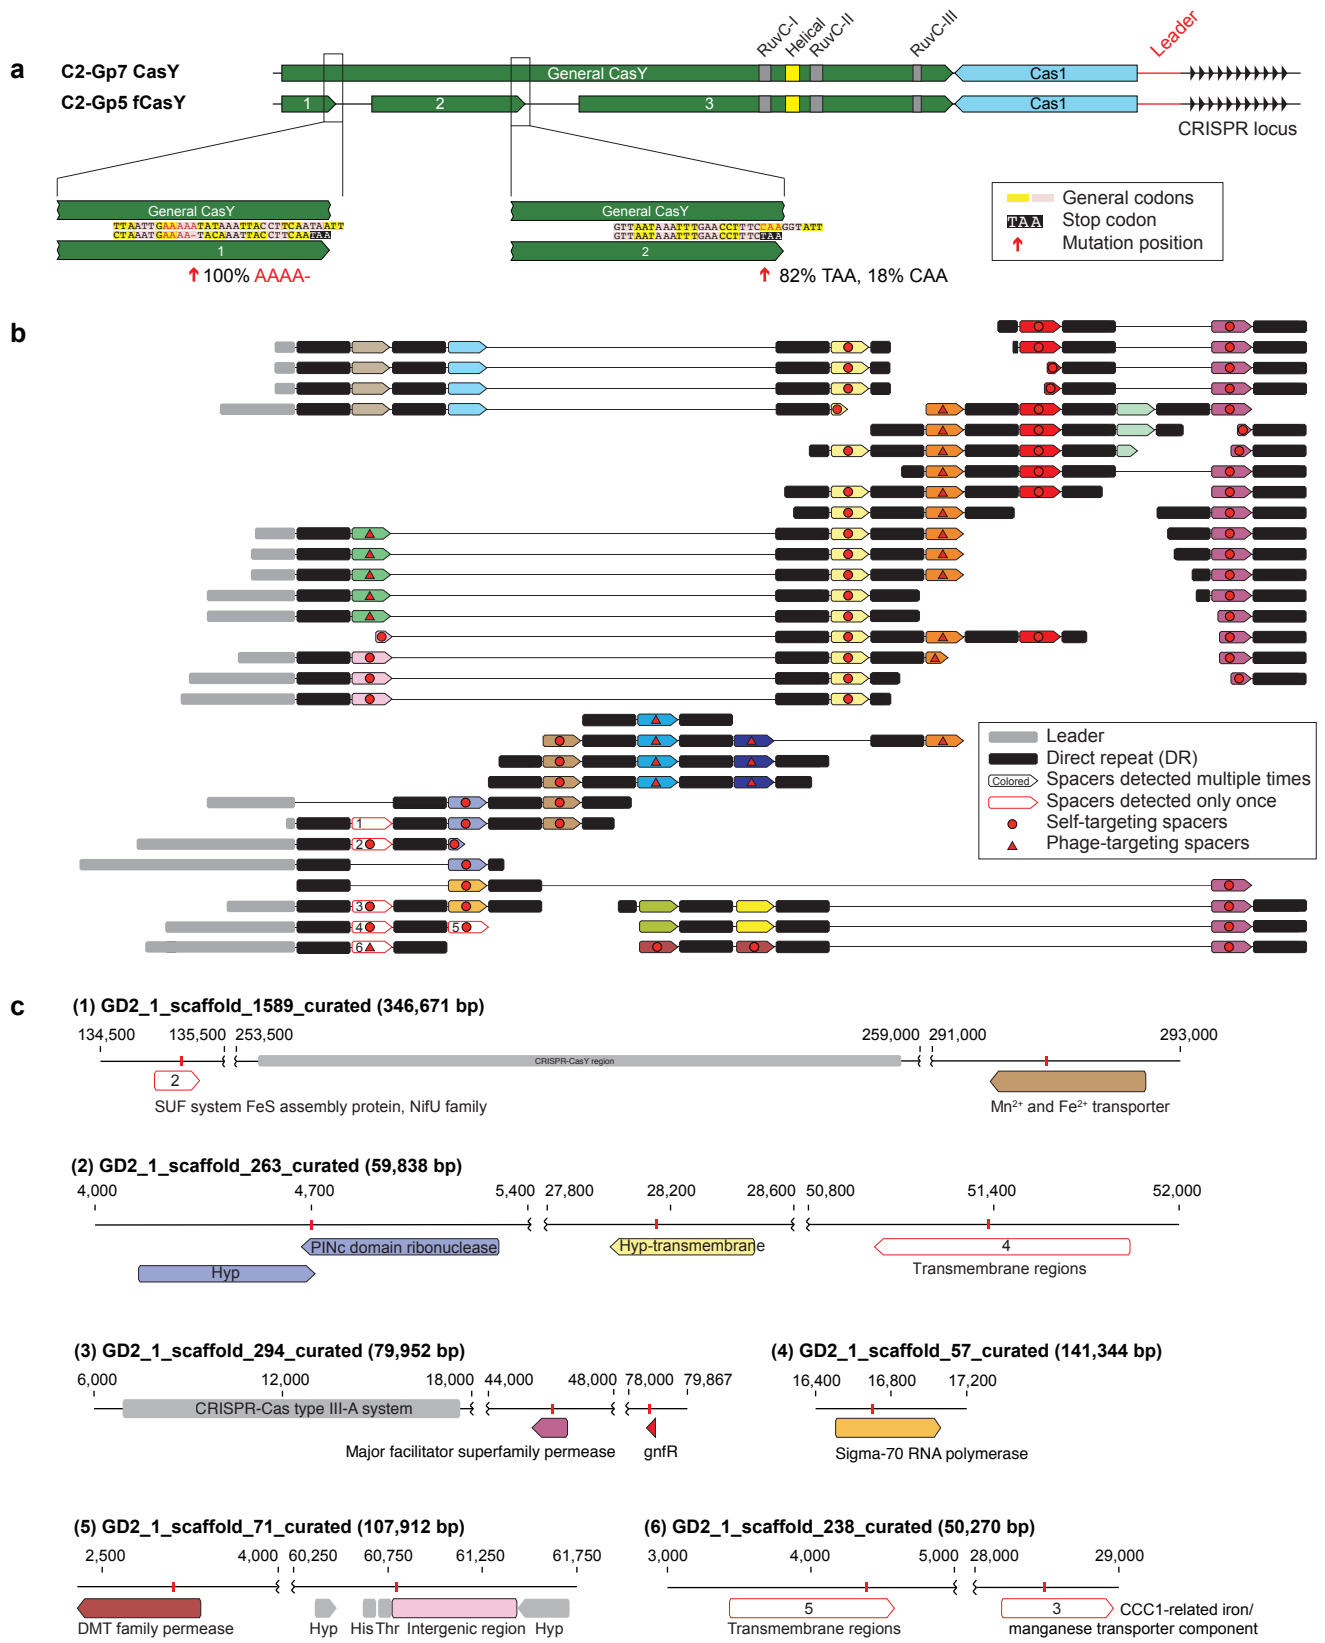

Figure 5
